# Supplementary material
Source: publisher figshare collection journal article supplement (https://frontiersin.figshare.com/ndownloader/files/17294783)
Supplement: Supplementary file 1 [file 17294783]

## Sheet: alldata
Supplementary Data
			Ultrameter Measurements					Spectrophotometry					IC			ICP									Water isotopes		Dissolved Carbon				Dissolved Gases
site	date sampled	FlowRate (mL/min)	Temperature ('C)	Conductivity (uS)	TDS (ppm)	pH	ORP (mV)	NO3- (mg/L)	NH4+ (mg/L)	Fe2+ (mg/L)	S2- (ug/L)	DO (mg/L)	SO4 (mg/L)	Cl (mg/L)	F (mg/L)	Mg (ppm)	Ca (ppm)	Na (ppm)	Si (ppm)	Fe (ppm)	Mn (ppm)	Ba (ppm)	B (ppm)	Li (ppm)	water dD (permil)	water dO (permil)	DOC (mg/L)	DOC (mM)	DIC (mM)	d13C DIC (permil)	CO2 (nM)	C2H6 (nM)	CH4 (nM)	CO (nM)	He (nM)	H2 (nM)
D1	2015-12-07	NA	9.9	943	684.1	7.65	-99	NA	NA	NA	NA	NA	310	10.9		37.7	121	27.3	8.3	6.21	0.197	0.044	0.2	0.048	-125.7	-17.1	NA	NA	NA	NA	NA	NA	NA	NA	NA	NA
D1	2016-05-02	NA	10.9	956.5	684	7.93	-113	0.5	0.06	2.28	8	0.2	355	11.6	0.5	36.7	118	26.9	7.8	5.13	0.184	0.043	0.2	0.045	NA	NA	NA	NA	NA	NA	NA	NA	NA	NA	NA	NA
D1	2016-05-18	NA	9.9	952.3	687	8.24	-132	0.2	0.08	2.6	0	0.054	340	11.4	0.27	35.9	115	25.3	7.7	4.92	0.179	0.042	0.19	0.04	-123.877	-17.1524	0.486	0.0405	NA	NA	534.916	0	0.79866	0.465021	0.0428089	0.25019
D1	2016-07-11	2933	10.2	950.2	680.4	7.62	-42	0.2	0.09	2.12	0	0.1	312	10.9	0.47	37.8	123	27.2	7.9	5.02	0.179	0.041	0.19	0.038	-123.836	-17.1499	0.42	0.035	4.00991	-9.95724	624.928	0	0.512689	0.0383192	0.065539	0.0352379
D1	2016-09-20	2873.33	10.1	937	674.3	6.66	-59	0.3	0.08	2.49	0	0.117	302	10.6	0.32	37.2	117	27.2	7.9	4.67	0.183	0.042	0.2	0.043	-119	-15.8	0.45	0.0375	4.13395	-10.2545	388.344	0	0.201704	0.0998337	0.020271	0.00829862
D1	2016-12-09	2800	10	956.1	688.7	7.37	-96	0.2	0.07	2.27	0	0	297	11.3	0.4	34.7	110	25.2	7.2	4.61	0.16	0.038	0.18	0.036	-124.494	-16.6219	0.4	0.0333333	4.21997	-12.397	NA	NA	NA	NA	NA	NA
D1	2017-02-15	2787	10	949.1	671.4	7.52	-120	0.3	0.06	2.33	0	NA	325	11.2	0.44	37.8	118	28	7.9	4.92	0.175	0.038	0.18	0.045	-124.05	-16.6736	0.426	0.0355	4.30045	-11.635	487.888	0	0.45317	0.20644	0.0397978	0.263274
D1	2017-05-09	3000	10.5	1052	758.5	6.49	-47	0.1	0.05	1.6	2	0.019	386	12.8	0.74	40.9	134	30.7	7.8	7	0.236	0.042	0.26	0.048	-122.847	-16.7348	0.403	0.0335833	4.15	-11.285	NA	NA	NA	NA	NA	NA
D1	2017-08-31	2800	10.1	972.8	700.2	7.75	-93	0.3	0.05	1.91	2	0.035	323	12.5	0.5	38.7	120	28.4	8	4.92	0.218	0.042	0.24	0.041	-123.528	-16.9694	0.435	0.03625	4.4	-11.995	542.937	0	0.316239	0.172357	0.0178201	0.0330271
D1	2017-11-30	516.6	10.3	993.4	715.4	7.35	-94	0.3	0.07	4.06	1	0.025	330	10.3	0.29	39.9	127	29.9	8	5.42	0.235	0.039	0.26	0.045	-123.923	-17.1306	0.39	0.0325	4.25	-11.835	533.616	0	0.617804	0.197401	0.0494691	0.121792
D2	2015-12-07	NA	12.7	623.6	440.9	8.26	-192	NA	NA	NA	NA	NA	87.4	16.4	0.79	29.3	46.5	39	5.1	0.42	0.048	0.133	0.07	0.04	-129.2	-17.6	NA	NA	NA	NA	NA	NA	NA	NA	NA	NA
D2	2016-05-02	NA	NA	NA	NA	NA	NA	0.5	0	0.28	62	12	79.6	16.1	0.77	28	44.1	36.9	4.8	0.3	0.045	0.136	0.07	0.038	NA	NA	0.475	0.0395833	NA	NA	NA	NA	NA	NA	NA	NA
D2	2016-05-18	250	12.6	605.1	427.5	7.94	-101	0.1	0.02	0.29	7	0.304	80.9	16	0.77	27.6	43.8	36	4.8	0.32	0.042	0.133	0.06	0.034	-127.407	-17.5928	0.521	0.0434167	NA	NA	422.493	0	0.281988	0.188188	0.0102117	0.10726
D2	2016-07-11	295	12.5	618.5	436.7	8.12	-150	0.2	0.02	0.31	16	0.215	84.5	16.1	0.81	29.9	48.2	39.8	4.9	0.4	0.044	0.131	0.06	0.033	-127.657	-17.661	0.422	0.0351667	4.7985	-9.72557	476.194	0	0.428922	0.0524554	0.0167024	0.0392065
D2	2016-09-20	320	12.4	616.9	435.5	7.5	-98	0	0.02	0.25	32	0.276	82.3	16	0.82	28.9	46	38.9	4.9	0.36	0.052	0.131	0.07	0.039	-126	-17.1	0.412	0.0343333	4.93368	-9.52552	329.7	0	0.206684	0.422333	0.0111577	0.316065
D2	2016-12-09	300	12.5	626.5	443.5	7.72	-93	0.1	0.03	0.31	29	0.54	80.3	16.1	0.8	27.2	43.7	37.2	4.6	0.26	0.043	0.12	0.07	0.031	-127.625	-17.1088	0.387	0.03225	4.83713	-10.2205	383.801	0	0.31255	0.0919527	0.0172192	0.0900928
D2	2017-02-15	300	12.5	630.3	444.8	7.67	-97	0.2	0.02	0.32	16	0.561	91.2	17	0.84	29.9	47.1	40.1	5	0.35	0.052	0.125	0.06	0.039	-127.261	-17.1871	0.417	0.03475	4.0209	-10.7415	444.242	0	0.289375	0.214376	0.0167432	0.226893
D2	2017-05-09	600	12.5	608.2	429.6	7.27	-93	0.3	0.01	0.3	12	0.475	83.8	16.7	0.86	29.3	45.8	38.7	4.9	0.34	0.049	0.136	0.07	0.037	-126.652	-17.1825	0.388	0.0323333	4.805	-10.475	365.781	0	0.403646	0.0426004	0.0206101	0.061457
D2	2017-09-01	300	12.5	622.2	439.4	7.84	-151	0.4	0.03	0.3	21	na	85.5	17.3	0.89	30.2	46.6	39	5	0.34	0.051	0.133	0.08	0.033	-127.205	-17.3236	0.421	0.0350833	4.85	-10.93	470.325	0	0.592391	0.112984	0.0218488	0.0165942
D2	2017-11-30	350	12.4	622.5	439.7	7.9	-152	0.2	0.02	0.29	21	0.63	81.5	16.7	0.77	30.2	47.6	38.6	5	0.31	0.046	0.131	0.08	0.036	-127.692	-17.5711	0.355	0.0295833	4.85	-10.735	334.514	0	0.407291	0.303661	0.0145987	0.259286
D3	2015-12-09	NA	16.3	3044	2321	7.35	-20	NA	NA	NA	NA	NA	1640	7.87	0.45	237	357	98.1	6.2	1.53	0.269	0.03	0.15	0.137	-122.305	-16.8704	NA	NA	NA	NA	NA	NA	NA	NA	NA	NA
D3	2016-05-05	NA	16.3	3026	2309	7.19	-53	0.5	0.27	2.32	14	1.6	1780	7.65	0.49	232	342	98.6	6.1	2.9	0.263	0.029	0.14	0.121	NA	NA	0.252	0.021	NA	NA	NA	NA	NA	NA	NA	NA
D3	2016-05-16	1400	16.1	3048	2302	7.94	14	0.8	0.24	1.8	7	3.1	1880	7.73	0.51	232	351	97.7	6.3	1.97	0.272	0.029	0.13	0.117	-121.08	-16.9017	0.344	0.0286667	NA	NA	2163.19	0	1.43858	0.078314	0.0138592	0.0741073
D3	2016-07-12	1250	16.1	3036	2310	7.42	52	0.2	0.21	2.83	0	0.0085	1610	7.6	0.51	250	374	108	6.6	3.27	0.266	0.033	0.12	0.119	-121.324	-16.8874	0.257	0.0214167	6.53989	-2.36629	2132.27	0.0194352	6.84489	0.0401394	0.145223	0.122445
D3	2016-09-21	1346	16.1	2998	2281	7.03	-42	0.3	0.31	2.71	8	0.034	1590	NA	NA	236	352	108	6.5	3.18	0.28	0.029	0.13	0.124	-120	-16.3	0.226	0.0188333	9.58612	-5.28362	2541.77	0	5.91024	0.580579	0.151446	0.458935
D3	2016-12-08	3500	16.2	3036	2313	7.27	-30	0.2	0.28	2.92	0	0.147	1540	12.3	NA	226	326	97.1	5.9	2.85	0.251	0.027	0.12	0.112	-121.231	-16.3539	0.259	0.0215833	10.3608	-7.30582	1602.51	0	4.05838	0.192967	0.106715	0.23439
D3	2017-02-16	1400	16.3	3029	2305	7.04	-57	0.1	0.2	2.58	14	0.016	1610	NA	NA	242	347	111	6.6	3.1	0.28	0.025	0.12	0.127	-120.821	-16.4047	0.205	0.0170833	8.04359	-7.5323	2958.78	0	5.64288	0.145749	0.169713	0.127656
D3	2017-05-11	1200	16.2	3039	2313	6.89	-39	0.3	0.21	2.3	21	0.031	1610	NA	1.38	235	345	113	6.4	2.98	0.269	0.031	0.15	0.125	-120.025	-16.3141	0.206	0.0171667	12.61	-7.815	1029.7	0	1.002	0.0478383	0.0350629	0.0741758
D3	2017-08-30	1300	16.1	3048	2323	6.23	-45	0.3	0.24	2.72	19	0.026	1630	NA	NA	243	351	112	6.6	2.98	0.275	0.03	0.15	0.119	-121.146	-16.7185	0.288	0.024	11.3	-8.585	2570.66	0	5.21881	1.1905	0.142121	1.03567
D3	2017-11-27	850	16.2	3057	2330	6.54	-68	0.3	0.21	2.8	16	0.004	1660	NA	NA	242	358	114	6.6	3.08	0.278	0.027	0.14	0.124	-121.483	-16.902	0.181	0.0150833	11.25	-8.5	1721.32	0	4.18454	0.0621298	0.112883	0.00509898
D4	2015-12-10	NA	22.9	1758	1283	8.83	-276	NA	NA	NA	NA	NA	272	20.7	6.22	8.1	7.4	364	8.2	NA	0.005	0.041	0.59	0.261	-129.079	-17.5852	NA	NA	NA	NA	NA	NA	NA	NA	NA	NA
D4	2016-05-04	NA	22.7	1763	1289	8.62	-241	1	1.2	0.11	978	0.8	299	20.7	6.77	7.9	7.1	371	8	NA	0.005	0.042	0.61	0.253	NA	NA	0.236	0.0196667	NA	NA	480.331	4.21206	96.8199	0.0444862	8.55106	0.229419
D4	2016-05-17	NA	22.6	1765	1292	8.62489	-171	0.9	1.34	0	1264	0.08	297	20.7	6.17	8.1	7.2	367	7.9	NA	NA	0.041	0.61	0.251	NA	NA	0.279	0.02325	NA	NA	359.456	2.35789	55.3236	0.122236	4.72328	0.197695
D4	2016-05-17	800	22.6	1770	1294	8.56728	-163	0.9	1.68	0.03	1080	0.25	301	20.7	6.32	8.4	7.5	367	8	NA	NA	0.04	0.61	0.252	-127.67	-17.5918	0.28	0.0233333	NA	NA	199.606	1.18722	28.3971	0.048201	2.1037	0.146835
D4	2016-07-11	NA	22.7	1768	1291	8.07	-250	1	1.64	0.01	546	0.041	283	20.5	6.44	8.4	7.6	377	8.1	NA	NA	0.039	0.6	0.251	-127.271	-17.5126	0.213	0.01775	12.7653	-9.70411	275.943	2.0923	47.7171	0.0281945	4.10152	0.101166
D4	2016-09-20	900	22.7	1760	1284	8.4	-254	1.1	1.64	0.01	992	0.127	272	19.8	6.43	7.6	6.9	388	8	0.06	0.007	0.041	0.62	0.253	-126	-17.1	0.202	0.0168333	12.8626	-9.73862	279.403	1.89508	39.6776	0.175867	3.33671	0.414256
D4	2016-12-06	820	22.6	1774	1296	8.88	-278	1	1.56	0.01	537	0.043	262	19.7	5.97	7.7	6.9	357	7.3	NA	NA	0.038	0.56	0.237	-127.616	-17.0957	0.174	0.0145	12.8602	-9.87746	312.043	2.09885	39.2929	0.0129903	4.26722	0
D4	2017-02-15	850	22.6	1767	1290	7.28	-200	0.9	1.24	0	864	0.027	289	21.2	6.83	8	7	382	8.1	NA	0.007	0.037	0.6	0.255	-127.574	-17.0377	0.168	0.014	13.5863	-10.0292	280.611	1.83449	37.054	0.0605796	3.2498	0.228435
D4	2017-05-09	580	22.1	1777	1296	8.22	-172	1.1	1	0	678	0.027	294	21.7	7.08	8.2	7.4	394	8	NA	0.008	0.043	0.62	0.253	-127.021	-17.2139	0.2	0.0166667	16.305	-10.205	213.37	1.15995	22.2211	0.0168073	1.95144	0.0806803
D4	2017-09-01	700	22.5	1777	1300	8.36	-255	0.9	1.24	0.01	916	0.031	284	21	6.67	8.2	7.2	388	8.1	0.09	0.007	0.042	0.61	0.247	-127.55	-17.2887	0.232	0.0193333	13	-10.235	298.979	2.20736	48.1948	0.484342	3.76398	0.387048
D4	2017-10-16	350	22.6	1773	1296	8.38	-154	0.8	1.24	0	830	0.017	286	21.5	6.68	8.1	7.1	382	8	NA	NA	0.037	0.62	0.245	NA	NA	NA	NA	NA	NA	318.176	2.12967	45.0312	0.213624	3.57413	0.329244
D4	2017-11-30	275	21.9	1778	1300	8.34	-241	1	1.12	0	928	0.045	275	18.6	6.29	8.2	7.3	392	8.1	NA	NA	0.038	0.6	0.248	-127.968	-17.5967	0.115	0.00958333	13.15	-10.37	254.831	1.59618	33.3429	0.186383	2.56724	0.242644
D5	2015-12-08	NA	32.8	1562	1128	9.12	-312	NA	NA	NA	NA	NA	167	19.6	5.44	6	4.4	338	7.2	NA	NA	0.063	0.41	0.241	-128.5	-17.5	NA	NA	NA	NA	NA	NA	NA	NA	NA	NA
D5	2016-05-03	NA	32.6	1560	1127	8.61	-240	0.6	0.4	0.03	268	0.4	182	19.6	5.87	5.8	4.2	339	7	NA	NA	0.063	0.54	0.234	NA	NA	NA	NA	NA	NA	121.568	0.816772	61.1083	0.059518	3.48392	0.194323
D5	2016-05-03	NA	32	1559	1120	8.69	-173	0.7	0.43	0	196	6.3	177	19.6	5.76	5.4	4	337	6.9	NA	NA	0.063	0.53	0.232	NA	NA	NA	NA	NA	NA	NA	NA	NA	NA	NA	NA
D5	2016-05-04	NA	32.1	1540	1107	8.69	-208	0.6	0.36	0.13	218	2.2	177	19.4	5.97	5.3	3.9	335	6.9	NA	NA	0.061	0.53	0.233	NA	NA	0.216	0.018	NA	NA	NA	NA	NA	NA	NA	NA
D5	2016-05-19	1700	31.1	1534	1107	8.61	-133	0.7	0.48	0	354	0	184	19	5.91	5.3	4.1	332	7	0.18	0.007	0.062	0.52	0.228	-127.604	-17.5872	0.228	0.019	NA	NA	84.2297	0.448313	30.8668	0.0969681	0.720234	0.0505468
D5	2016-07-13	14200	32.1	1542	1108	8.75	-312	0.8	0.47	0	336	0.007	172	19	5.71	5.3	4.1	337	7.1	NA	NA	0.062	0.51	0.227	-127.706	-17.5425	0.218	0.0181667	13.129	-9.60581	94.1911	0.270134	15.8588	0.0768888	0.592364	0.0196469
D5	2016-09-22	16400	31.5	1536	1107	8.83	-232	0.8	0.5	0.01	397	0.07	167	18.4	5.6	5.1	4	352	6.9	0.02	NA	0.065	0.53	0.233	-127	-17.1	0.161	0.0134167	12.6146	-9.61852	146.923	0.306653	17.5543	0.577338	0.713994	0.762235
D5	2016-12-07	17280	31.4	1540	1109	9.07	-233	0.7	0.46	0	329	0.058	156	17.9	5.25	5	3.8	342	6.9	NA	NA	0.057	0.53	0.223	-127.703	-16.9864	NA	NA	12.8035	-9.98926	66.7964	0.0677073	3.73809	0.185054	0.223195	0.320634
D5	2017-02-14	16100	32	1540	1110	8.38	-133	0.8	0.49	0	336	0.008	173	19.5	5.83	5.2	3.8	344	7.1	0.02	NA	0.06	0.51	0.233	-126.675	-17.2368	0.123	0.01025	13.4109	-9.80659	90.793	0.109486	6.40024	0.082161	0.355697	0.132054
D5	2017-05-10	14000	31.1	1539	1107	8.78	-223	0.9	0.47	0.01	348	0.041	170	19.4	5.92	5.1	3.8	352	6.9	0.02	NA	0.068	0.52	0.231	-126.738	-17.0621	0.233	0.0194167	16.1	-10	121.762	0.424507	22.7697	0.0270883	0.854858	0.062045
D5	2017-08-29	14700	31.7	1538	1106	8.35	-163	1.1	0.43	0	395	0.003	172	19.7	6.04	5.1	3.6	345	7.1	NA	NA	0.065	0.52	0.221	-127.219	-17.3652	0.214	0.0178333	12.7	-10.14	112.765	0.216707	15.8696	0.162397	0.707654	0.144244
D5	2017-11-28	7300	30.7	1544	1110	7.63	-199	0.7	0.49	0	308	0.02	172	19.1	5.59	5.1	3.9	352	7.1	NA	NA	0.065	0.52	0.227	-127.556	-17.4817	0.133	0.0110833	12.95	-10.15	136.42	0.322445	19.7811	0.0457657	0.812937	0.0994232
D6	2015-12-08	0	21	7894	6579	9.37	-350	NA	NA	NA	NA	NA	4190	219	2.83	99.6	330	1330	1	0.47	0.198	0.009	0.48	2.38	-116.285	-15.838	NA	NA	NA	NA	NA	NA	NA	NA	NA	NA
D6	2016-05-04	0	21.3	7825	6530	9.3	-324	0.3	0.12	0.18	61	1.1	3710	181	3.01	91.2	309	1590	0.9	0.34	0.159	0.021	0.91	2.28	NA	NA	NA	NA	NA	NA	10.8341	3.28423	643.591	0.0639384	15.716	0.503251
D6	2016-05-19	0	21.6	7883	6554	8.97	-134	0.3	0.13	0.08	86	0.68	4290	208	2.96	89.4	310	1510	1.1	0.15	0.175	0.009	0.9	2.23	-115.232	-15.8857	0.314	0.0261667	NA	NA	15.7808	1.87871	376.855	0.0781257	9.87017	0.273991
D6	2016-07-13	0	22.1	7875	6538	9.18	-314	0.2	0.13	0.09	98	0.015	4180	211	3.11	95.7	331	1580	1	0.18	0.173	0.008	0.87	2.32	-115.208	-15.8242	0.386	0.0321667	0.494457	-14.2788	21.105	2.25739	423.626	0.105797	12.3426	0.522186
D6	2016-09-22	0	21.8	7987	6636	8.14	-250	0.3	0.06	2.03	73	0.07	4290	217	NA	98.9	325	1600	6.4	3.78	0.346	NA	0.94	2.22	-113	-15.8	0.158	0.0131667	NA	NA	58.3176	0.367321	79.5051	0	2.48482	0.0908914
D6	2016-12-07	0	24.6	7978	6685	8.64	-205	0.4	0.08	1.23	55	0.09	4370	233	3.12	93	310	1510	5.2	2.32	0.332	0.007	0.85	2.08	-114.887	-15.3816	0.136	0.0113333	2.9424	-13.1457	78.4503	0.918928	174.04	0.0630309	6.6932	0.20018
D6	2017-02-14	0	20.8	7937	6619	8.11	-213	0.3	0.08	1.43	74	0.02	4280	216	3.48	98	327	1600	5.3	2.5	0.39	0.005	0.92	2.23	NA	NA	0.136	0.0113333	2.6944	-13.4312	64.9689	1.88914	371.095	0	10.0236	0.402776
D6	2017-05-11	0	20.2	7952	6621	8.29	-257	0.3	0.06	1.74	122	0.312	4260	225	5.23	98.2	323	1570	6.9	4.47	0.357	0.01	0.94	2.27	NA	NA	0.186	0.0155	2.77	-12.7	NA	NA	NA	NA	NA	NA
D6	2017-08-29	0	22.2	7945	6613	8.13	-207	0.3	0.03	1.51	88	0.007	4400	233	NA	99.3	320	1600	5.3	1.97	0.334	0.009	0.94	2.17	-114.853	-15.7132	0.288	0.024	2.6	-13.425	57.8821	1.54878	350.453	0.177272	9.23194	0.101113
D6	2017-11-28	0	20.6	7974	6641	6.68	-188	0.3	0.01	2.93	20	0.009	4220	207	NA	99.7	334	1600	6.3	8.84	0.655	0.005	0.92	2.18	-115.295	-15.8508	0.319	0.0265833	2.65	-12.51	144.669	0.407149	95.2296	0.232927	2.85543	0.340297

## Sheet: mineral saturation state
Supplementary Data
DeMMO 1		DeMMO 2		DeMMO 3		DeMMO 4		DeMMO 5		DeMMO 6
mineral	log Q/K	mineral	log Q/K	mineral	log Q/K	mineral	log Q/K	mineral	log Q/K	mineral	log Q/K
Birnessite	40.8447s/sat	Birnessite	23.2483s/sat	Birnessite	41.2460s/sat	Birnessite	31.3320s/sat	Antigorite	14.4218s/sat	Birnessite	54.7144s/sat
Todorokite	35.6008s/sat	Todorokite	20.1263s/sat	Todorokite	35.8570s/sat	Todorokite	27.2626s/sat	Pyrolusite	7.1975s/sat	Todorokite	47.6845s/sat
Pyrolusite	7.4325s/sat	Pyrite	6.0917s/sat	Pyrolusite	7.5232s/sat	Pyrolusite	6.1445s/sat	Bixbyite	6.9467s/sat	Bixbyite	10.6009s/sat
Bixbyite	6.8734s/sat	Pyrolusite	5.2913s/sat	Bixbyite	6.9808s/sat	Bixbyite	4.8615s/sat	Witherite	5.2505s/sat	Hausmannite	9.5736s/sat
Beidellit-Ca	5.9100s/sat	Witherite	4.1078s/sat	Pyrite	6.0116s/sat	Pyrite	4.7229s/sat	Hausmannite	4.2423s/sat	Pyrolusite	9.1146s/sat
Beidellit-Mg	5.8571s/sat	Barite	2.6690s/sat	Hausmannite	3.8922s/sat	Dolomite	2.1691s/sat	Saponite-Mg	3.7509s/sat	Pyrite	6.8695s/sat
Kaolinite	5.7931s/sat	Bixbyite	2.3903s/sat	Manganite	3.3117s/sat	Dolomite-ord	2.1691s/sat	Saponite-Na	3.6711s/sat	Daphnite-14A	5.6089s/sat
Beidellit-Na	5.3921s/sat	Dolomite-ord	1.1747s/sat	Dolomite	1.9769s/sat	Manganite	2.1528s/sat	Saponite-Ca	3.6541s/sat	Manganite	5.0378s/sat
Paragonite	5.1556s/sat	Dolomite	1.1747s/sat	Dolomite-ord	1.9769s/sat	Witherite	1.9827s/sat	Pyrite	3.2927s/sat	Ripidolit-14A	3.1698s/sat
Pyrite	5.1140s/sat	Manganite	1.0793s/sat	Calcite	0.5102s/sat	Hausmannite	1.0710s/sat	Talc	2.8652s/sat	Daphnite-7A	2.2034s/sat
Beidellit-H	5.0265s/sat	Quartz	0.1598s/sat	Dolomite-dis	0.3665s/sat	Talc	1.0521s/sat	Dolomite	2.6220s/sat	Dolomite	2.1543s/sat
Pyrophyllite	4.8228s/sat	Calcite	0.1540s/sat	Witherite	0.3538s/sat	Saponite-Mg	0.9628s/sat	Dolomite-ord	2.6220s/sat	Dolomite-ord	2.1543s/sat
Clinoptil-Ca	4.2277s/sat	Alstonite	0.1350s/sat	Aragonite	0.3444s/sat	Saponite-Na	0.9156s/sat	Clinochl-14A	2.5791s/sat	Saponite-Ca	1.8779s/sat
Hausmannite	3.7307s/sat			Quartz	0.2008s/sat	Saponite-Ca	0.8964s/sat	Barite	2.5145s/sat	Saponite-Na	1.8645s/sat
Manganite	3.3565s/sat			Barite	0.1760s/sat	Dolomite-dis	0.6057s/sat	Saponite-H	2.4766s/sat	Saponite-Mg	1.8527s/sat
Heulandite	3.0190s/sat			Siderite	0.1275s/sat	Calcite	0.4803s/sat	Dolomite-dis	1.1240s/sat	Paragonite	1.6902s/sat
Laumontite	2.5807s/sat			Tridymite	0.0266s/sat	Aragonite	0.3153s/sat	Chrysotile	1.0242s/sat	Minnesotaite	1.6205s/sat
Gibbsite	2.3024s/sat					Quartz	0.1637s/sat	Calcite	0.6356s/sat	Kaolinite	1.5516s/sat
Daphnite-14A	1.9575s/sat					Magnesite	0.0440s/sat	Aragonite	0.4718s/sat	Greenalite	1.2496s/sat
Margarite	1.6872s/sat							Magnesite	0.3962s/sat	Chamosite-7A	1.1035s/sat
Witherite	1.4865s/sat							Huntite	0.1404s/sat	Clinochl-14A	1.0483s/sat
Diaspore	1.3781s/sat									Amesite-14A	0.7646s/sat
Lawsonite	1.2831s/sat									Calcite	0.7484s/sat
Chamosite-7A	1.2713s/sat									Talc	0.7296s/sat
Barite	1.0970s/sat									Beidellit-Ca	0.7271s/sat
Dolomite-ord	0.4750s/sat									Beidellit-Na	0.7137s/sat
Dolomite	0.4750s/sat									Beidellit-Mg	0.7014s/sat
Boehmite	0.4538s/sat									Gibbsite	0.6962s/sat
Quartz	0.4019s/sat									Troilite	0.6732s/sat
Dawsonite	0.3493s/sat									Saponite-H	0.6471s/sat
Tridymite	0.2217s/sat									Dolomite-dis	0.5836s/sat
Albite (low)	0.1657s/sat									Aragonite	0.5833s/sat
Albite	0.1657s/sat									Witherite	0.4322s/sat
Chalcedony	0.1165s/sat									Fluorite	0.3997s/sat
Kyanite	0.1090s/sat									Barite	0.1683s/sat
										Siderite	0.1465s/sat
